# Supplementary material for: Exploring the arthritogenicity of Streptococcus dysgalactiae subspecies equisimilis
Source: PubMed Central journal article supplement (PMC5828338; doi:10.1186/s12866-018-1160-5), 2018-02-27
Supplement: 12866_2018_1160_MOESM1_ESM.pdf [file 12866_2018_1160_MOESM1_ESM.pdf]

**Table S1 Overview of genotypic and phenotypic characteristics of the SDSE - isolates**

| Isolate identity | Clinical manifestation | <i>emm</i> -type  | MLST-profile | FCT <sub>1</sub> variant | Fibronectin binding | Collagen I binding | Collagen II binding | Stainless steel binding |
|------------------|------------------------|-------------------|--------------|--------------------------|---------------------|--------------------|---------------------|-------------------------|
| T8               | OAI                    | <i>stG6.4</i>     | 335          | FCT-6                    | 33 %                | 9 %                | 5 %                 | 2,3                     |
| T55              | OAI                    | <i>stG6.3</i>     | 12           | FCT-6                    | 23 %                | 5 %                | 3 %                 | 2,0                     |
| T92              | OAI                    | <i>stG485.0</i>   | 29           | FCT-6                    | 51 %                | 0 %                | 0 %                 | 3,1                     |
| T108             | Pneumonia              | <i>stG485.0</i>   | 29           | FCT-6                    | 35 %                | 0 %                | 0 %                 | 2,0                     |
| T113             | SSTI                   | <i>stG10.0</i>    | 15           | FCT-6                    | 5 %                 | 73 %               | 74 %                | 2,8                     |
| T114             | SSTI                   | <i>stG643.0</i>   | 12           | FCT-6                    | 9 %                 | 5 %                | 4 %                 | 3,3                     |
| T148             | OAI                    | <i>stG643.0</i>   | 73           | FCT-6                    | 23 %                | 5 %                | 2 %                 | 2,9                     |
| T179             | Pneumonia              | <i>stG485.0</i>   | 69           | FCT-6                    | 48 %                | 40 %               | 16 %                | 2,8                     |
| T216             | SSTI                   | <i>stg480.0</i>   | 327          | FCT-6                    | 42 %                | 19 %               | 13 %                | 2,0                     |
| T221             | OAI                    | <i>stg485.0</i>   | 55           | FCT-6                    | 77 %                | 2 %                | 1 %                 | 2,3                     |
| T256             | SSTI                   | <i>stg485.0</i>   | 29           | FCT-6                    | 37 %                | 1 %                | 0 %                 | 2,4                     |
| T261             | SSTI                   | <i>stg6.0</i>     | 63           | FCT-6                    | 19 %                | 0 %                | 1 %                 | 4,9                     |
| T274             | Pneumonia              | <i>stG62647.0</i> | 20           | FCT-6                    | 77 %                | 1 %                | 1 %                 | 2,2                     |
| T283             | SSTI                   | <i>stg6.0</i>     | 63           | FCT-6                    | 77 %                | 2 %                | 1 %                 | 4,3                     |
| T297             | OAI                    | <i>stg643.1</i>   | 328          | FCT-6                    | 28 %                | 27 %               | 27 %                | 2,7                     |
| T299             | SSTI                   | <i>stc74a.0</i>   | 29           | FCT-6                    | 71 %                | 3 %                | 0 %                 | 2,0                     |
| T311             | SSTI                   | <i>stg485.0</i>   | 324          | FCT-6                    | 31 %                | 5 %                | 0 %                 | 2,2                     |
| T316             | SSTI                   | <i>stg6.1</i>     | 25           | FCT-6                    | 7 %                 | 25 %               | 11 %                | 2,0                     |
| T329             | SSTI                   | <i>stg652.0</i>   | 329          | FCT-6                    | 64 %                | 1 %                | 0 %                 | 2,2                     |
| T344             | SSTI                   | <i>stg643.0</i>   | 12           | FCT-6                    | 27 %                | 39 %               | 21 %                | 2,0                     |
| T376             | NSTI                   | <i>stg485.0</i>   | 325          | FCT-6                    | 19 %                | 4 %                | 1 %                 | 2,9                     |
| T396             | OAI                    | <i>stG485.0</i>   | 29           | FCT-6                    | 52 %                | 0 %                | 0 %                 | 2,7                     |
| T399             | SSTI                   | <i>stg166b.0</i>  | 29           | FCT-6                    | 44 %                | 2 %                | 2 %                 | 2,1                     |
| T404             | OAI                    | <i>stG120.0</i>   | 323          | <b>FCT-1</b>             | 22 %                | 82 %               | 68 %                | 2,4                     |
| T412             | OAI                    | <i>stC36.0</i>    | 49           | FCT-6                    | 24 %                | 0 %                | 0 %                 | 2,9                     |
| T413             | OAI                    | <i>stg5420.0</i>  | 25           | FCT-6                    | 21 %                | 49 %               | 75 %                | 2,3                     |
| T420             | OAI                    | <i>stg485.0</i>   | 128          | FCT-6                    | 42 %                | 30 %               | 13 %                | 2,3                     |
| T429             | OAI                    | <i>stg643.0</i>   | 73           | FCT-6                    | 28 %                | 11 %               | 3 %                 | 3,2                     |
| T437             | OAI                    | <i>stG62647.0</i> | 20           | FCT-6                    | 70 %                | 2 %                | 0 %                 | 2,3                     |
| T439             | Pneumonia              | <i>stg480.0</i>   | 8            | FCT-6                    | 35 %                | 5 %                | 1 %                 | 2,3                     |
| T441             | OAI                    | <i>stg643.0</i>   | 12           | FCT-6                    | 5 %                 | 10 %               | 6 %                 | 3,5                     |
| T446             | SSTI                   | <i>stg643.0</i>   | 331          | FCT-6                    | 11 %                | 5 %                | 2 %                 | 3,1                     |
| T450             | OAI                    | <i>stc74a.0</i>   | 29           | FCT-6                    | 48 %                | 22 %               | 13 %                | 2,3                     |
| T466             | OAI                    | <i>stg480.0</i>   | 8            | FCT-6                    | 45 %                | 5 %                | 2 %                 | 2,2                     |
| T469             | OAI                    | <i>stG643.0</i>   | 12           | FCT-6                    | 26 %                | 8 %                | 4 %                 | 3,2                     |
| T483             | OAI                    | <i>stG485.3</i>   | 332          | FCT-6                    | 75 %                | 1 %                | 1 %                 | 2,9                     |
| T488             | SSTI                   | <i>stc74a.0</i>   | 29           | FCT-6                    | 35 %                | 1 %                | 1 %                 | 3,2                     |
| T505             | SSTI                   | <i>stc74a.0</i>   | 17           | FCT-6                    | 31 %                | 0 %                | 0 %                 | 2,8                     |
| T512             | OAI                    | <i>stg485.0</i>   | 128          | FCT-6                    | 37 %                | 9 %                | 5 %                 | 2,1                     |
| T518             | OAI                    | <i>stg485.0</i>   | 17           | FCT-6                    | 23 %                | 2 %                | 1 %                 | 3,4                     |
| T519             | OAI                    | <i>stG480.0</i>   | 8            | FCT-6                    | 52 %                | 39 %               | 29 %                | 2,1                     |
| T528             | SSTI                   | <i>stg643.0</i>   | 12           | FCT-6                    | 22 %                | 9 %                | 3 %                 | 2,7                     |
| T532             | SSTI                   | <i>stg166b.0</i>  | 29           | FCT-6                    | 58 %                | 1 %                | 0 %                 | 3,2                     |
| T539             | OAI                    | <i>stg166b.0</i>  | 29           | FCT-6                    | 56 %                | 5 %                | 0 %                 | 3,8                     |
| T557             | OAI                    | <i>stG10.0</i>    | 333          | FCT-6                    | 9 %                 | 51 %               | 51 %                | 3,4                     |
| T560             | OAI                    | <i>stG62647.0</i> | 20           | FCT-6                    | 59 %                | 1 %                | 0 %                 | 2,3                     |

Table S1 - continued

| Isolate identity | Clinical manifestation | <i>emm</i> -type  | MLST-profile | FCT <sub>1</sub> variant | Fibronectin binding | Collagen I binding | Collagen II binding | Stainless steel binding |
|------------------|------------------------|-------------------|--------------|--------------------------|---------------------|--------------------|---------------------|-------------------------|
| T562             | OAI                    | <i>stG62647.0</i> | 20           | FCT-6                    | 55 %                | 2 %                | 0 %                 | 2,3                     |
| T570             | SSTI                   | <i>stg652.0</i>   | 114          | <b>FCT-5</b>             | 4 %                 | 0 %                | 1 %                 | 4,8                     |
| T577             | OAI                    | <i>stG6.0</i>     | 63           | FCT-6                    | 21 %                | 2 %                | 1 %                 | 4,1                     |
| T578             | SSTI                   | <i>stG485.0</i>   | 326          | FCT-6                    | 24 %                | 0 %                | 0 %                 | 4,4                     |
| T579             | OAI                    | <i>stG6.0</i>     | 334          | FCT-6                    | 10 %                | 1 %                | 1 %                 | 4,4                     |
| T596             | OAI                    | <i>stc74a.0</i>   | 29           | FCT-6                    | 54 %                | 0 %                | 0 %                 | 3,1                     |
| T599             | OAI                    | <i>stG62647.0</i> | 20           | FCT-6                    | 80 %                | 0 %                | 0 %                 | 2,2                     |

SDSE, *Streptococcus dysgalactiae* subspecies *equisimilis*; OAI, osteoarticular infection; SSTI, skin and soft-tissue infection; NSTI, necrotizing soft-tissue infection; MLST, Multilocus sequence typing; FCT, fibronectin, collagen and T-antigen-region.

FCT<sub>1</sub> variant refers to the nine structurally different FCT-regions characterized in *Streptococcus pyogenes* (1). The data for Fibronectin and Collagen type I binding represents the amount of adherent bacterial cells as a percentage of the original inoculum. Stainless steel binding is presented as the mean binding value divided by the mean value obtained from the control wells. Novel MLST-profiles are marked in red.

## References

1. Falugi F, Zingaretti C, Pinto V, Mariani M, Amodeo L, Manetti AG, Capo S, Musser JM, Orefici G, Margarit I, Telford JL, Grandi G, Mora M. 2008. Sequence variation in group A *Streptococcus pili* and association of pilus backbone types with lancefield T serotypes. *J Infect Dis* 198:1834-41. doi:10.1086/593176.
